# Supplementary material for: Pollinator sharing, copollination, and speciation by host shifting among six closely related dioecious fig species
Source: PubMed Central journal article supplement (PMC8993897; doi:10.1038/s42003-022-03223-0), 2022-04-08
Supplement: 42003_2022_3223_MOESM2_ESM.pdf [file 42003_2022_3223_MOESM2_ESM.pdf]

## Supplementary figures and tables

### Pollinator sharing, copollination, and speciation by host shifting among six closely related dioecious fig species

Zhi-Hui Su<sup>1,2</sup>, Ayako Sasaki<sup>1</sup>, Junko Kusumi<sup>3</sup>, Po-An Chou<sup>4</sup>, Hsy-Yu Tzeng<sup>4</sup>, Hong-Qing Li<sup>5</sup>, & Hui Yu<sup>6</sup>

<sup>1</sup>JT Biohistory Research Hall, Takatsuki, Osaka 569-1125, Japan. <sup>2</sup>Department of Biological Sciences, Graduate School of Science, Osaka University, Osaka 560-0043, Japan. <sup>3</sup>Department of Environmental Changes, Faculty of Social and Cultural Studies, Kyushu University, Fukuoka 819-0395, Japan. <sup>4</sup>Department of Forestry, National Chung Hsing University, Taichung 402, Taiwan. <sup>5</sup>School of Life Sciences, East China Normal University, Shanghai 200241, China. <sup>6</sup>Guangdong Provincial Key Laboratory of Digital Botanical Garden, South China Botanical Garden, The Chinese Academy of Sciences, Guangzhou 510650, China.

Correspondence and requests for materials should be addressed to Z.-H. S. (emails: [su.zhihui@brh.co.jp](mailto:su.zhihui@brh.co.jp)).

This file includes:

**Supplementary Figure 1.** BI tree of fig species based on 2198 SNPs from 80138 loci of MIG-seq data.

**Supplementary Figure 2.** Statistical-parsimony network of *F. erecta*, *F. formosana* and *F. vaccinioides* based on six non-coding regions (3715 sites) of the plastid DNA sequences.

**Supplementary Figure 3.** ML tree of ITS sequence (671 bp) from leaves and pollen (red and green, respectively) of four fig species.

**Supplementary Figure 4.** ML tree of pollinator wasps based on *COI-COII* sequences.

**Supplementary Figure 5.** BI tree of pollinator wasps based on *COI-COII* sequences.

**Supplementary Figure 6.** Sample localities of the pollinator wasps, *Blastophaga yeni* and *B. sp.* associated with *F. vaccinioides*.

**Supplementary Figure 7.** ML tree of pollinator wasps inferred by nuclear 28S rDNA sequences.

**Supplementary Figure 8.** ML tree of pollinator wasps based on ITS1 sequences.

**Supplementary Figure 9.** Species delimitation.

**Supplementary Figure 10.** The topology and chronogram based on 28S rDNA and *COI-COII* sequences of pollinator wasps.

**Supplementary Figure 11.** Population genetic structure of figs based on SSR data.

**Supplementary Figure 12.** Cophylogenetic analysis between figs and pollinator wasps.

**Supplementary Table 1.** Pairwise  $F_{ST}$  values between fig populations analyzed based on SSR data using Arlequin v3.5<sup>68</sup>.

**Supplementary Table 2.** Pairwise  $F_{ST}$  values between pollinator wasp populations analyzed based on SSR data using Arlequin v3.5<sup>68</sup>.

**Supplementary Table 3.** Primers used for PCR amplification in this study.

**Supplementary Table 4.** PCR amplification conditions.

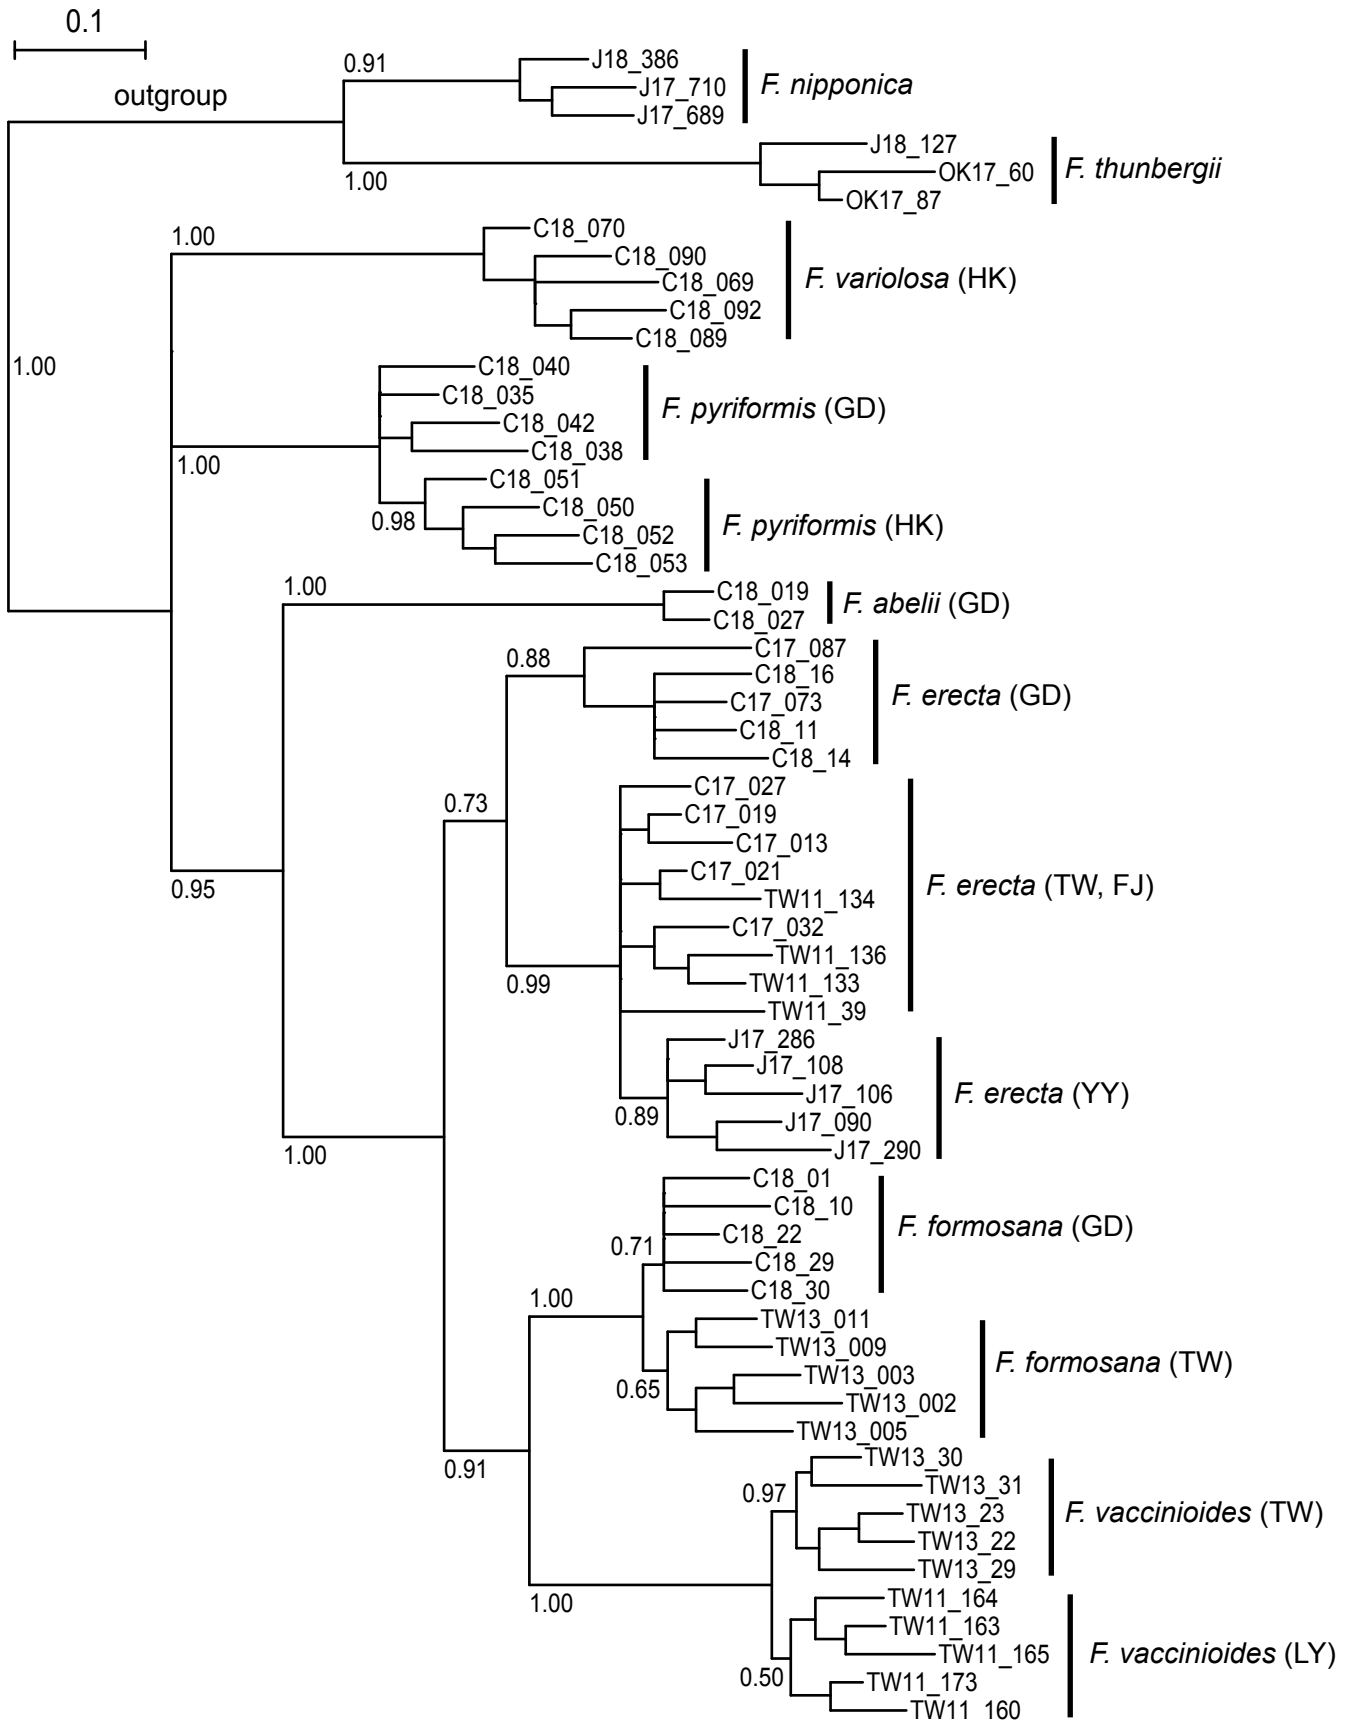

Supplementary Figure 1. BI tree of fig species based on 2198 SNPs from 80138 loci of MIG-seq data. The numbers at the nodes show posterior probability supports. For sample information, refer to Table 1 and Supplementary Data 1. For the abbreviations of population names in parentheses after the fig scientific names, refer to Fig. 1.

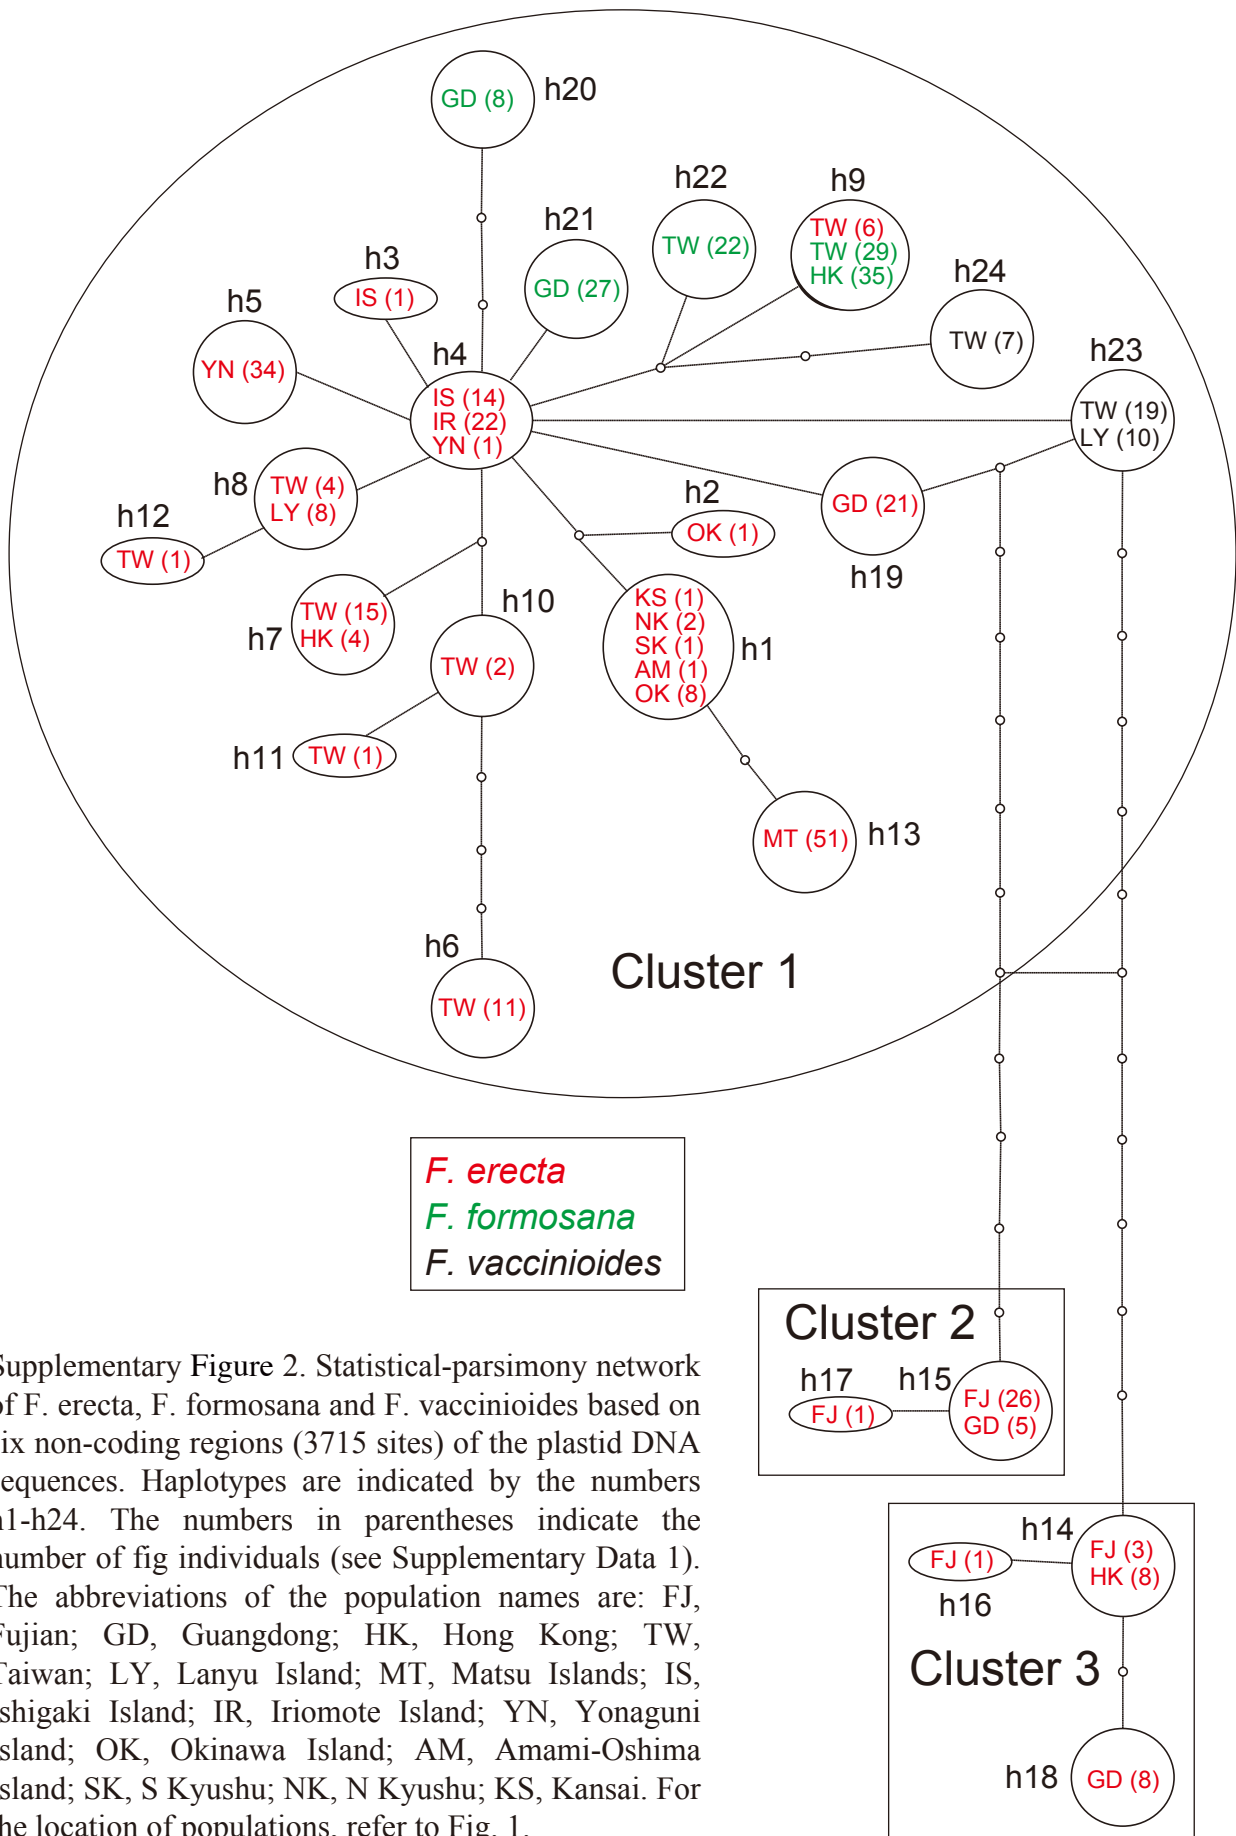

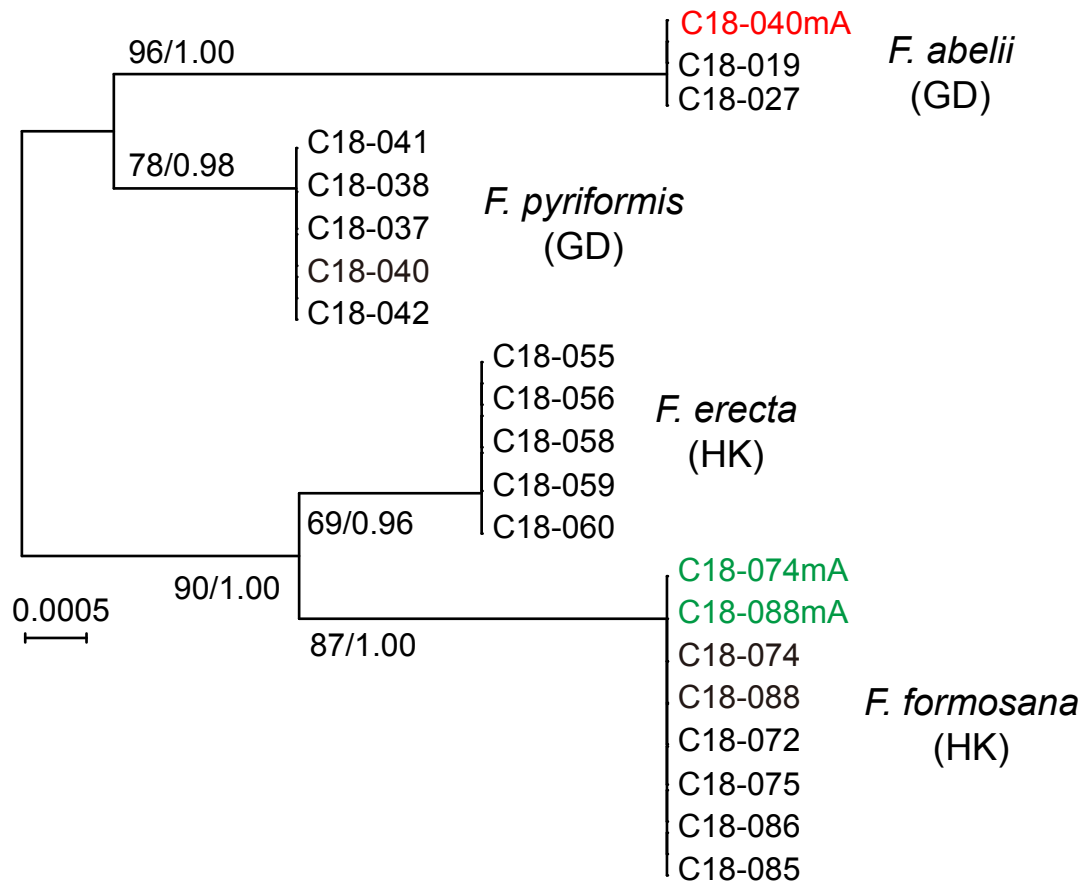

Supplementary Figure 3. ML tree of ITS sequence (671 bp) from leaves and pollen (red and green, respectively) of four fig species. BI analysis produced the same tree topology. The ML bootstrap values and BI posterior probabilities are indicated at the tree nodes (ML/BI). The sample names show the fig individuals from which leaves were collected, but the sample names indicated in red and green show the pollinator foundresses from which pollens was sampled. C18-040mA (red), C18-074mA (green) and C18-088mA (green) were collected from the inside of receptive syconia from *F. pyriformis* (C18-040) and *F. formosana* (C18-074 and C18-088). For sample information, refer to Supplementary Data 1. Species names and population names are shown to the right side of the tree. The results show that the pollinator wasp C18-040mA collected from inside the receptive syconia of *F. pyriformis* carried pollen of *F. abelii*. In other words, pollinator wasps that are reared in *F. abelii* can enter the syconia of *F. pyriformis*.

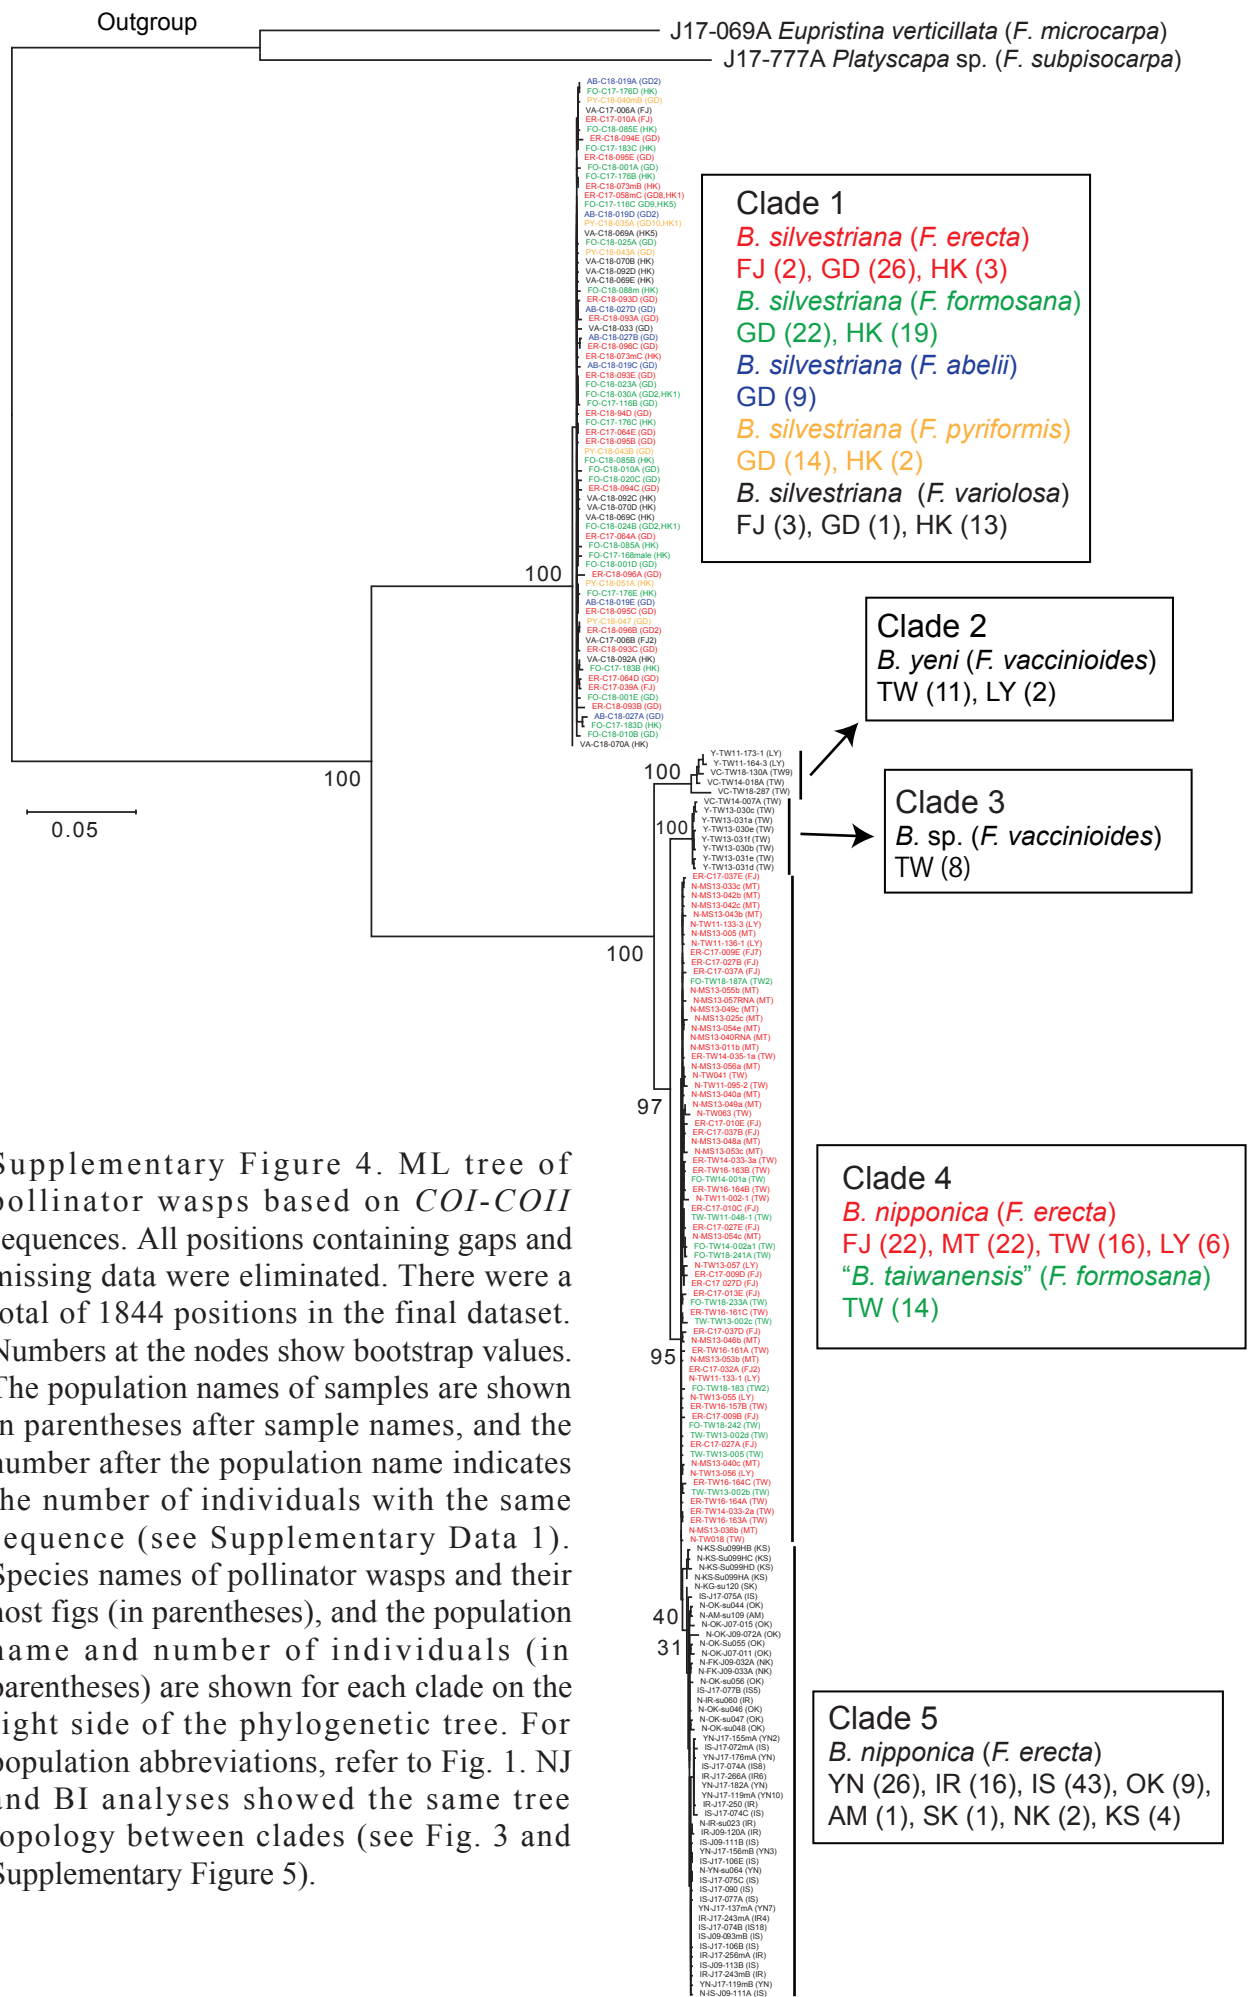

Supplementary Figure 4. ML tree of pollinator wasps based on *COI-COII* sequences. All positions containing gaps and missing data were eliminated. There were a total of 1844 positions in the final dataset. Numbers at the nodes show bootstrap values. The population names of samples are shown in parentheses after sample names, and the number after the population name indicates the number of individuals with the same sequence (see Supplementary Data 1). Species names of pollinator wasps and their host figs (in parentheses), and the population name and number of individuals (in parentheses) are shown for each clade on the right side of the phylogenetic tree. For population abbreviations, refer to Fig. 1. NJ and BI analyses showed the same tree topology between clades (see Fig. 3 and Supplementary Figure 5).

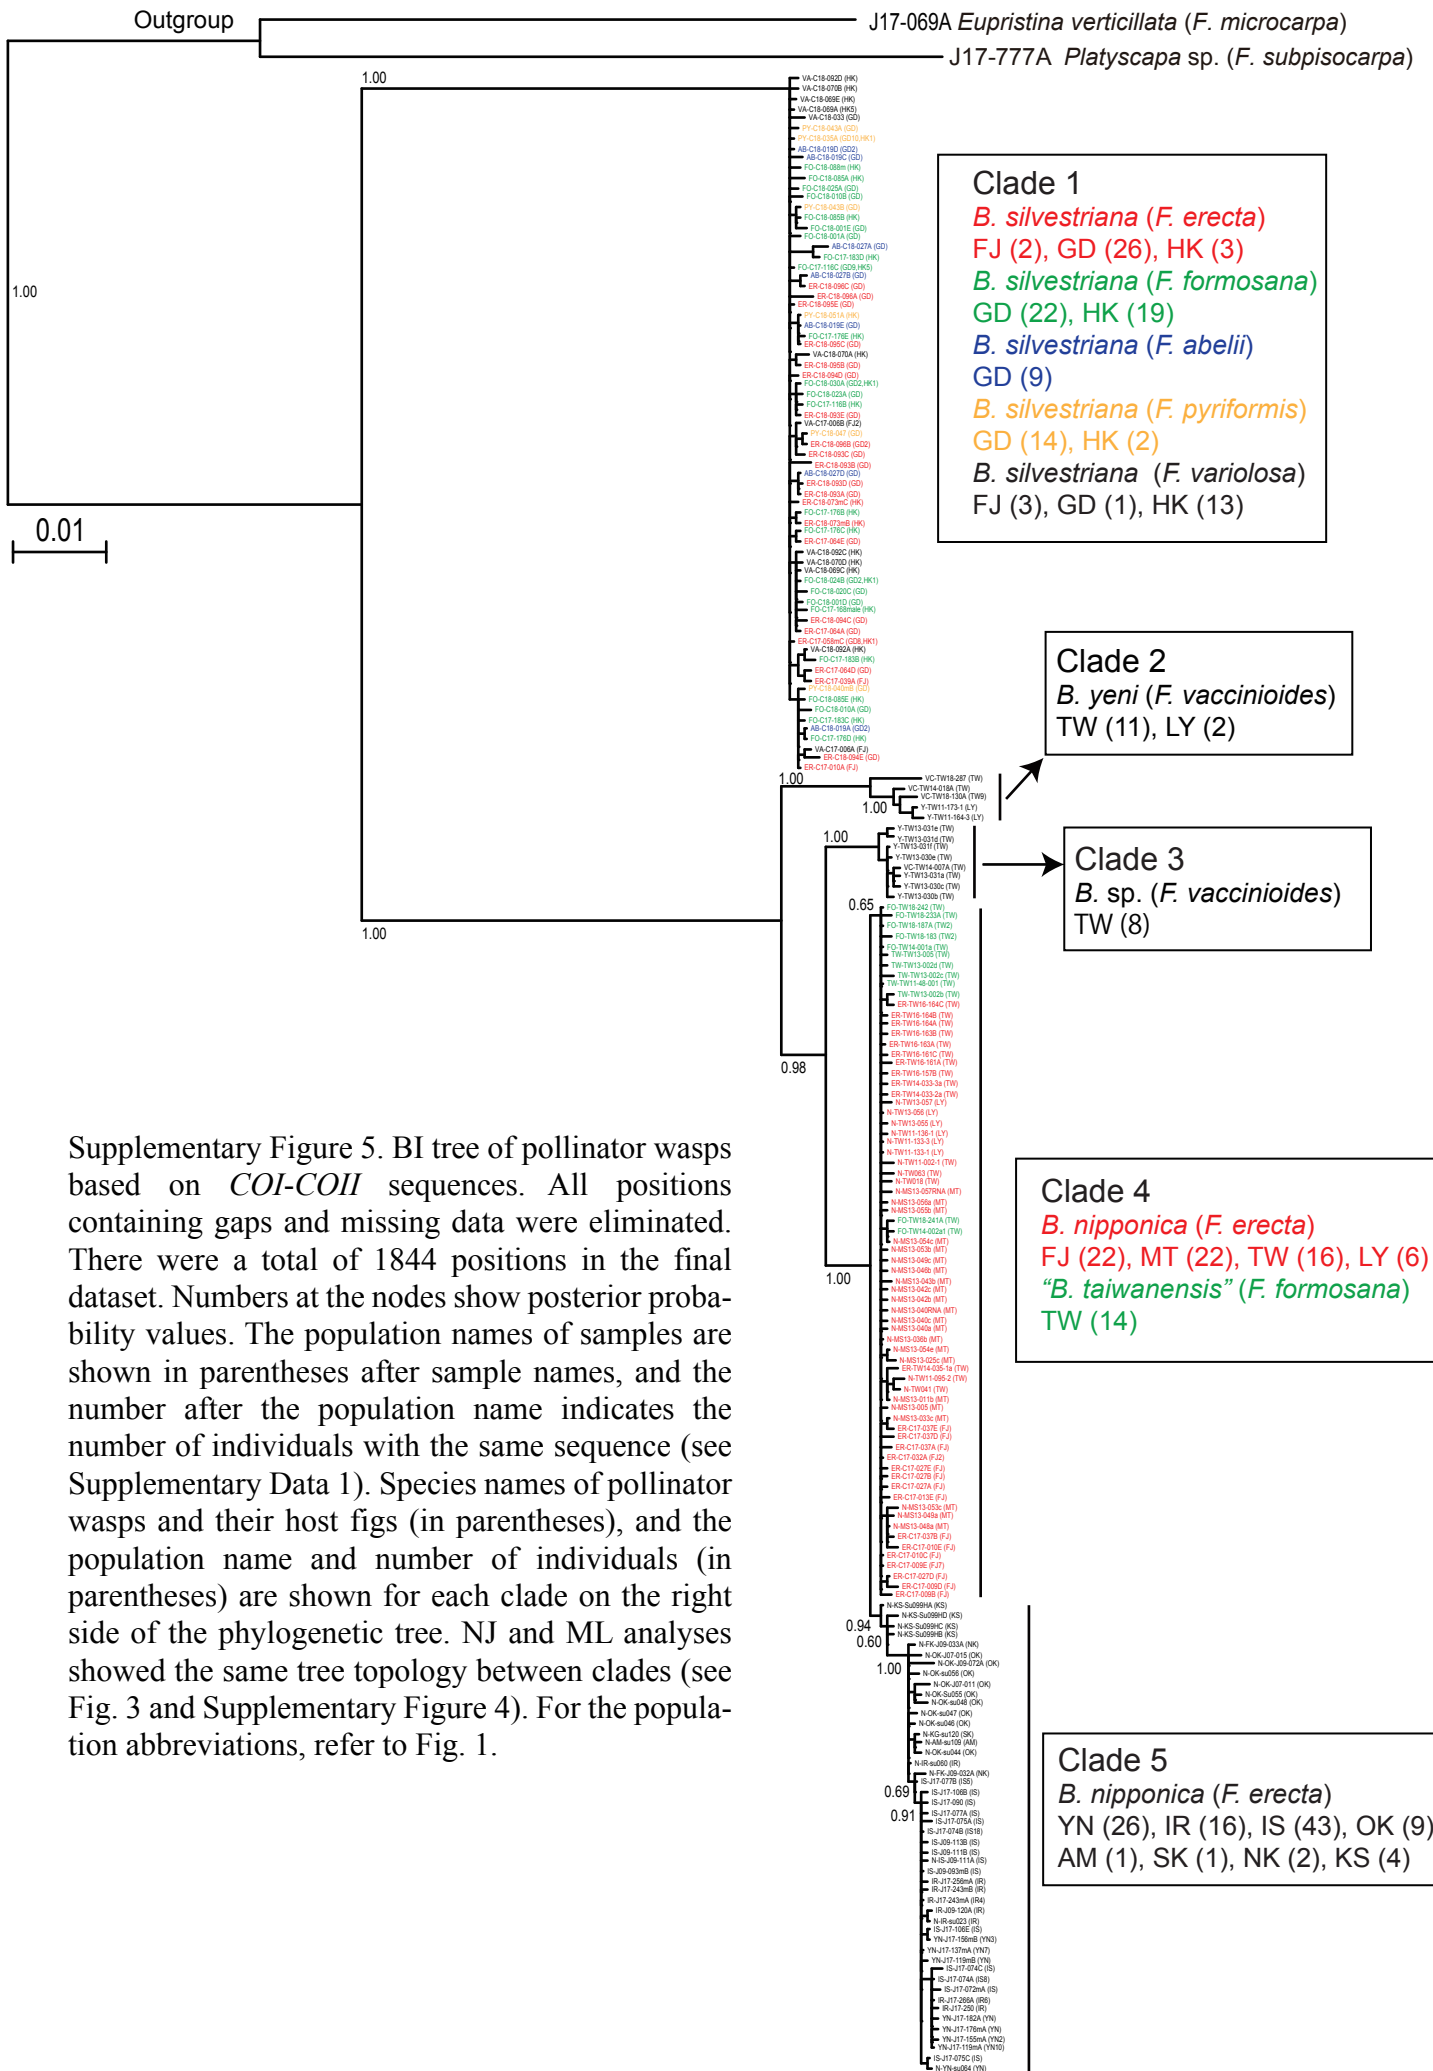

Supplementary Figure 5. BI tree of pollinator wasps based on *COI-COII* sequences. All positions containing gaps and missing data were eliminated. There were a total of 1844 positions in the final dataset. Numbers at the nodes show posterior probability values. The population names of samples are shown in parentheses after sample names, and the number after the population name indicates the number of individuals with the same sequence (see Supplementary Data 1). Species names of pollinator wasps and their host figs (in parentheses), and the population name and number of individuals (in parentheses) are shown for each clade on the right side of the phylogenetic tree. NJ and ML analyses showed the same tree topology between clades (see Fig. 3 and Supplementary Figure 4). For the population abbreviations, refer to Fig. 1.

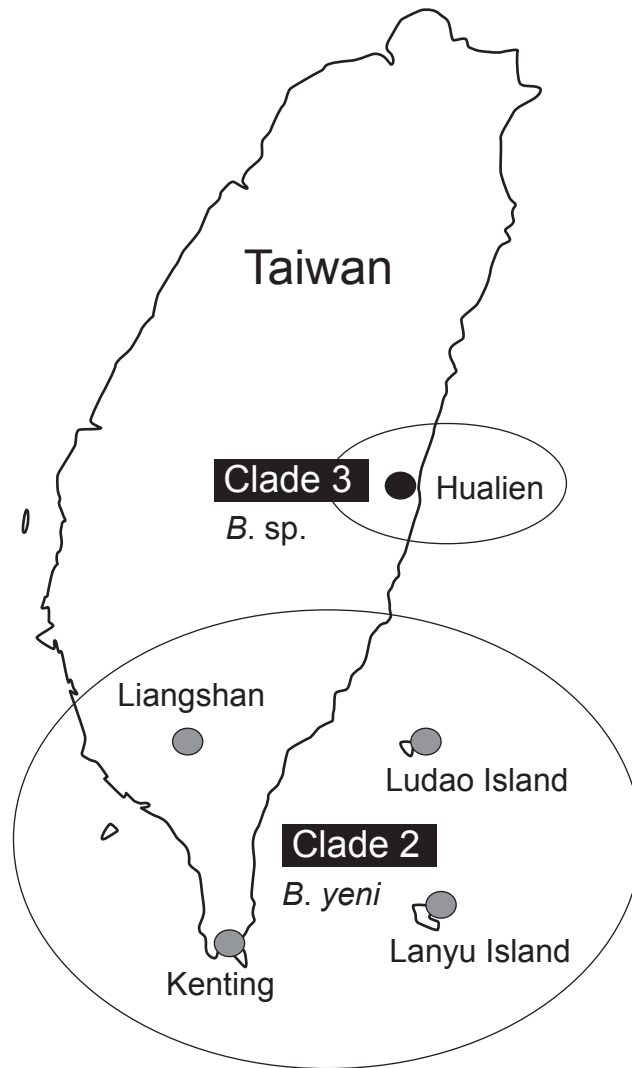

Supplementary Figure 6. Sample localities of the pollinator wasps (*Blastophaga yeni* and *B. sp.*) associated with *F. vaccinioides*. The two genetically distinct clades (Clades 2 and 3 in Fig. 3) are indicated.



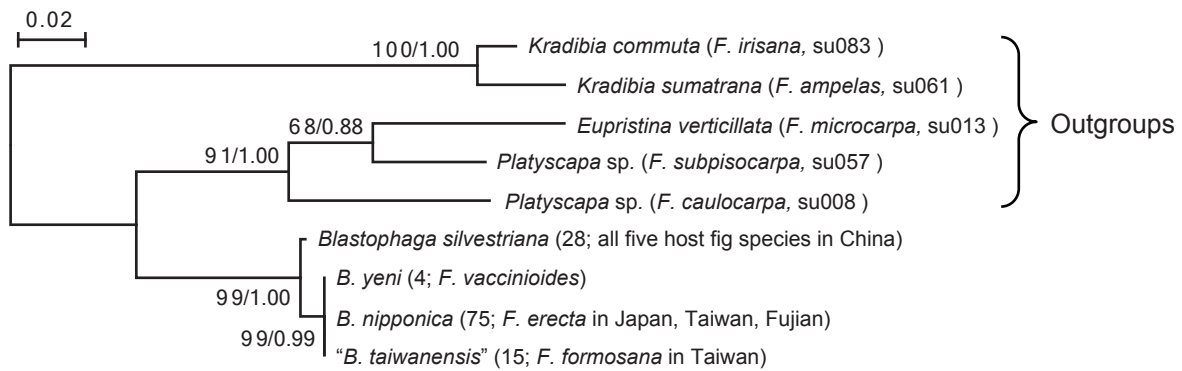

Supplementary Figure 7. ML tree of pollinator wasps inferred by nuclear 28S rDNA sequences. Five species were used as outgroups for the phylogenetic analyses. All positions containing gaps and missing data were eliminated. There was a total of 830 positions in the final dataset. The host fig species are shown in parentheses with the number indicating the wasp individuals with the same sequence. BI analysis produced the same tree topology. ML bootstrap values/BI posterior probabilities are indicated at tree nodes.

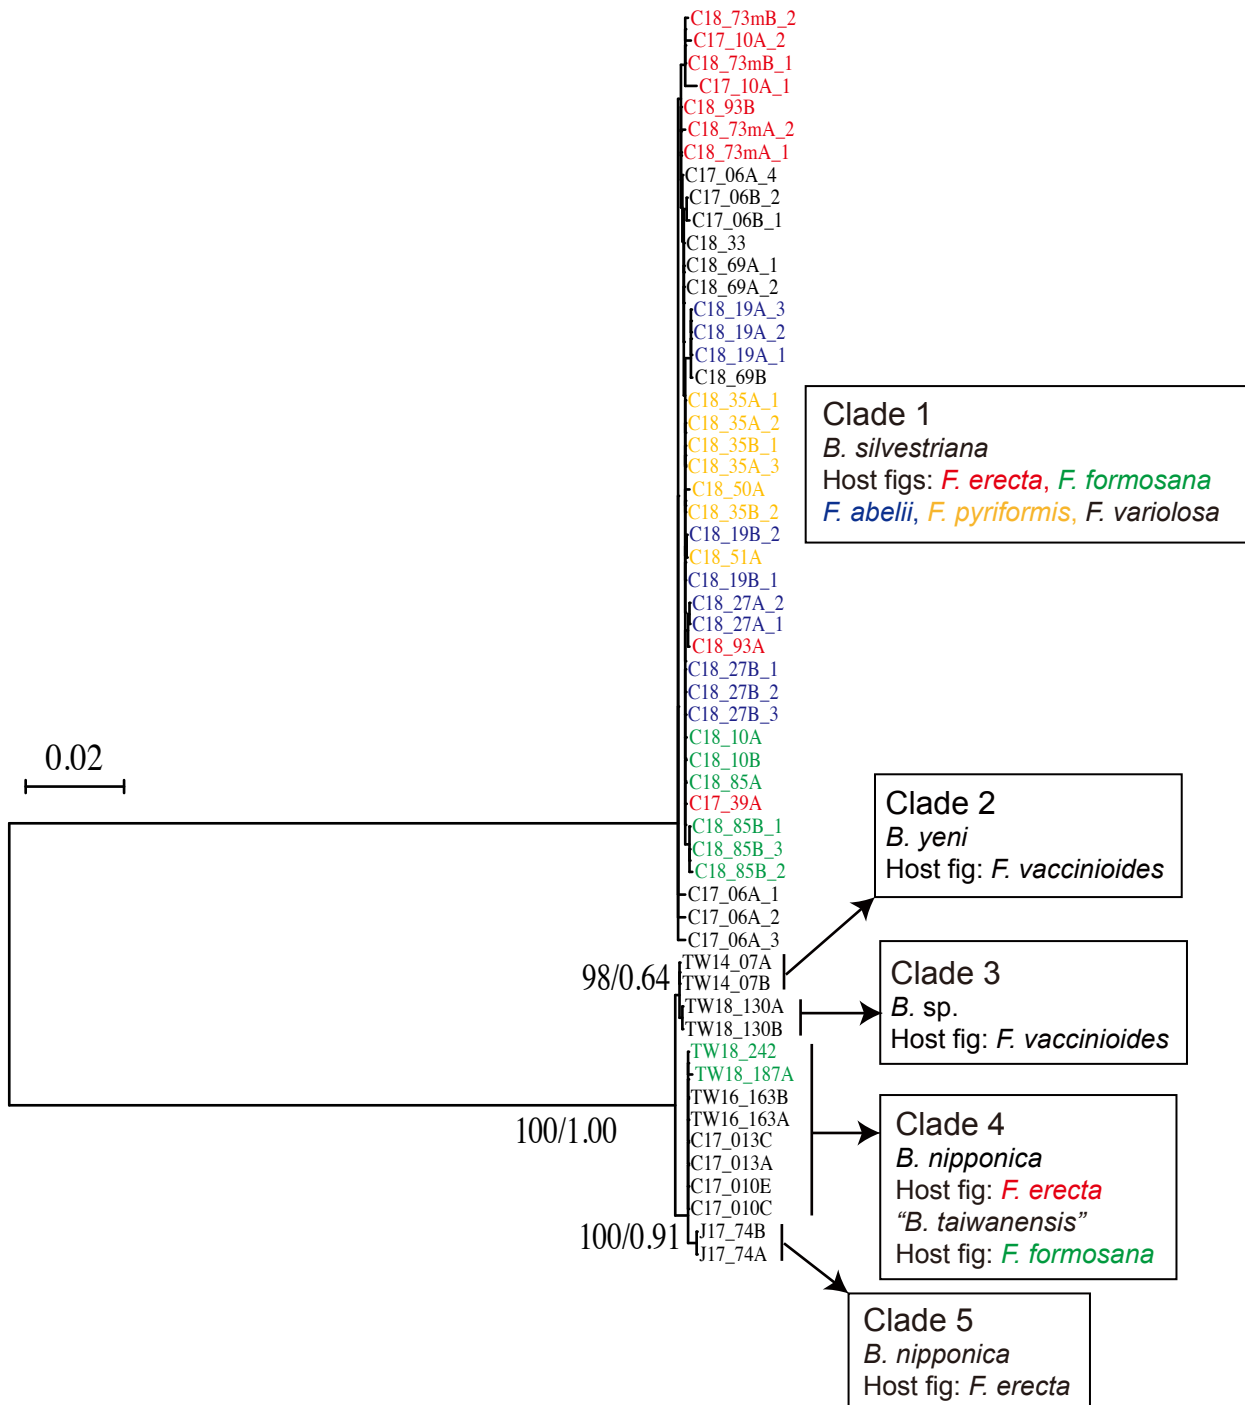

Supplementary Figure 8. ML tree of pollinator wasps based on ITS1 sequences. There were a total of 1712 positions in the final dataset. BI analysis gave the same topology, except for some small differences within clades (tree not shown). ML bootstrap values/BI posterior probabilities are indicated at tree nodes. The phylogenetic clades correspond to that shown in Fig. 3.

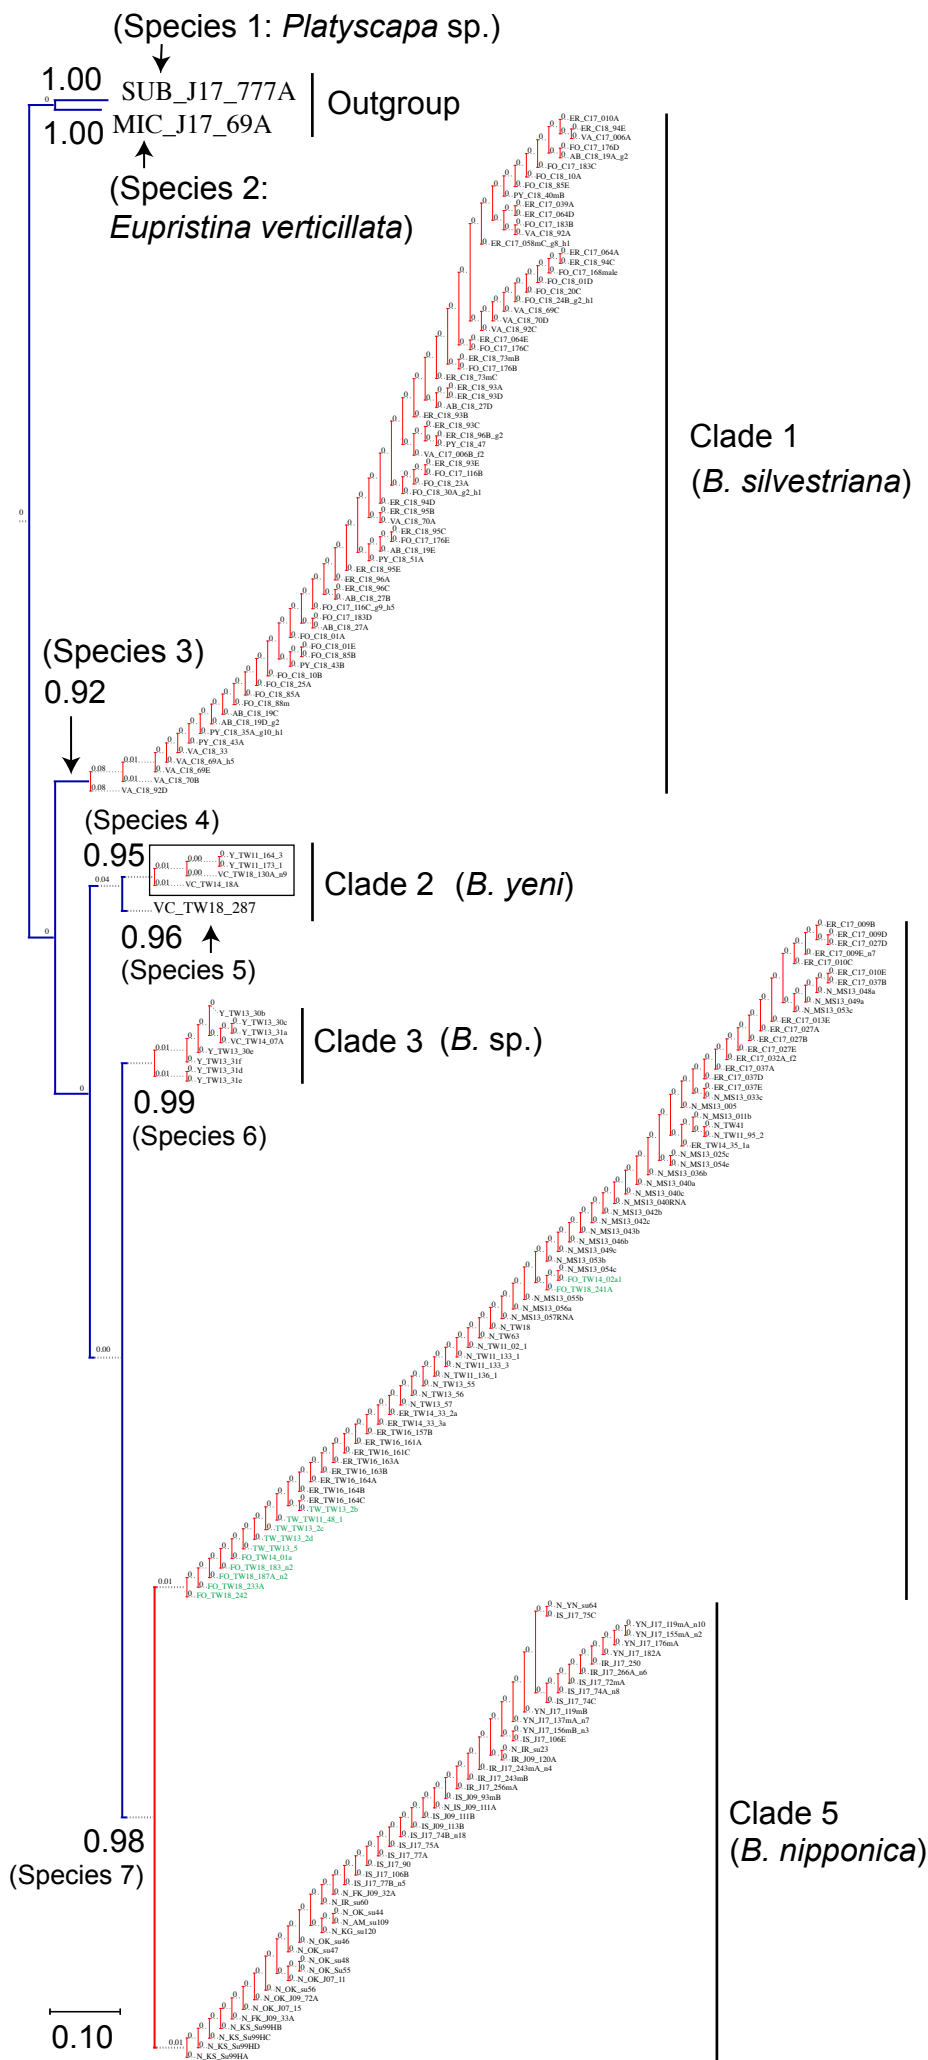

Supplementary Figure 9. Species delimitation. The BI tree (Supplementary Figure 5) inferred using *COI-COII* sequences was used to identify phylogenetic species using the Poisson Tree Processes (PTP) model<sup>76</sup>. Five species (Species 3~7) were estimated for Blastophaga wasps. Species 1 and Species 2 are outgroups. The known species names are shown for each phylogenetic clade (see Fig. 3).

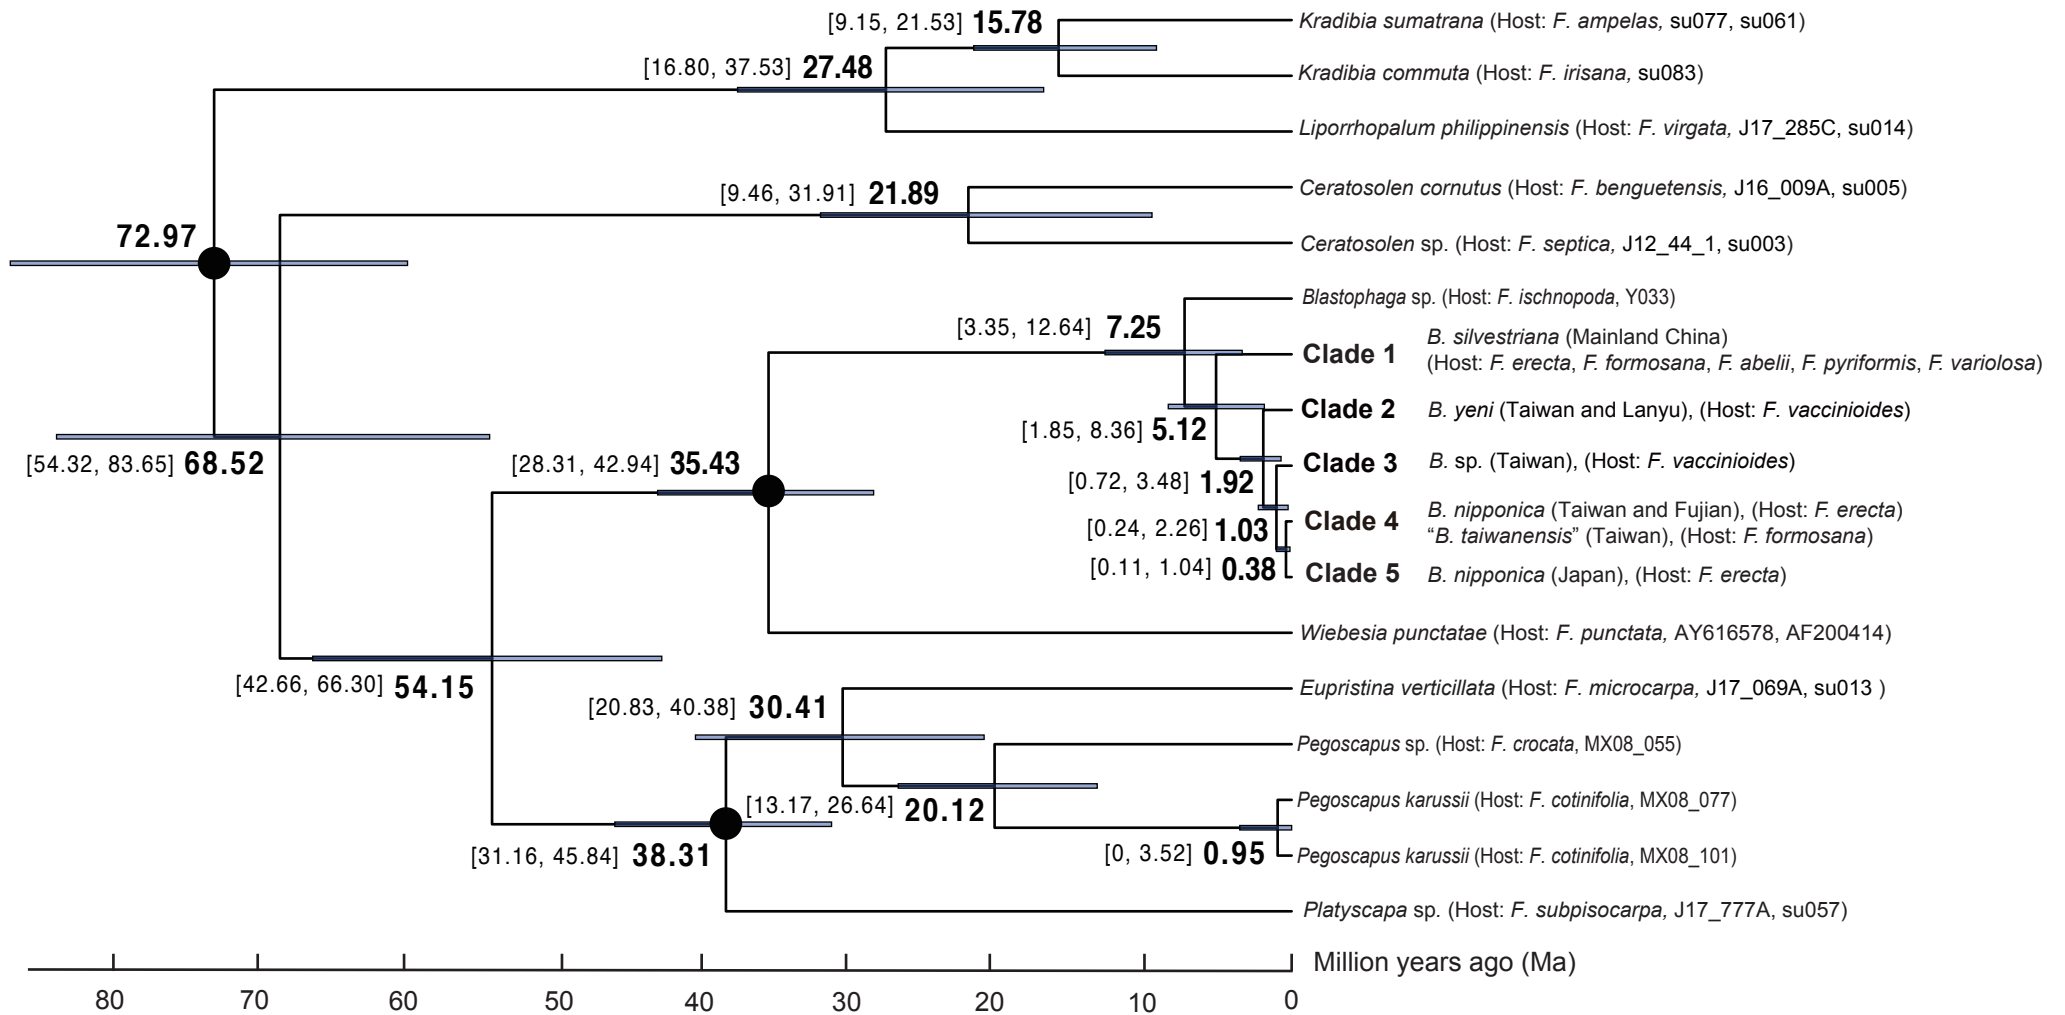

Supplementary Figure 10. The topology and chronogram based on 28S rDNA and *COI-COII* sequences of pollinator wasps. The analysis was performed with BEAST. Grey bars around nodes indicate the 95% highest posterior density (HPD) intervals. The divergence time (mean) and CI (confidence intervals) were shown at the nodes. Black circles at three nodes show calibration points (refer to Methods).

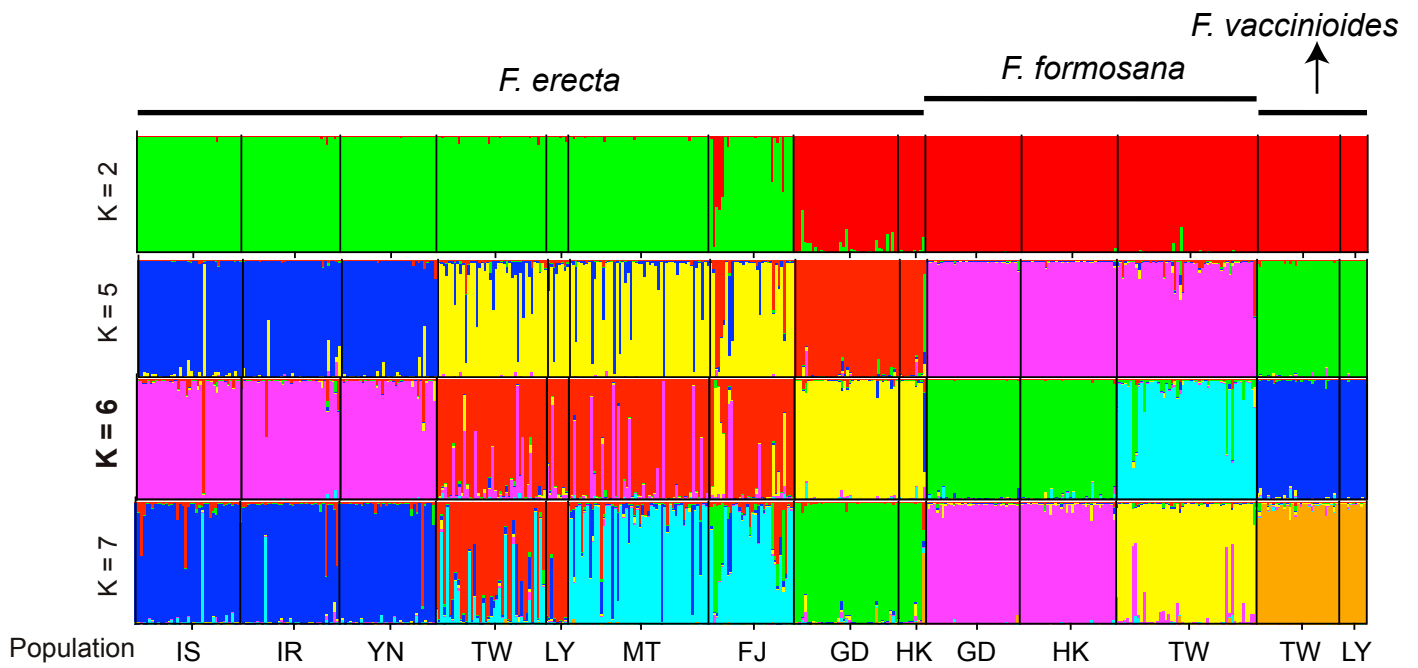

Supplementary Figure 11. Population genetic structure of figs based on SSR data. SSR data were genotyped from nine loci.  $K=6$  was the most likely  $K$ . Structures with  $K=2$ ,  $K=5$ , and  $K=7$  are also shown (refer to results). The samples used in these analyses are shown in Table 1 and Supplementary Data 1. For the abbreviations of population names, refer to Fig. 1.

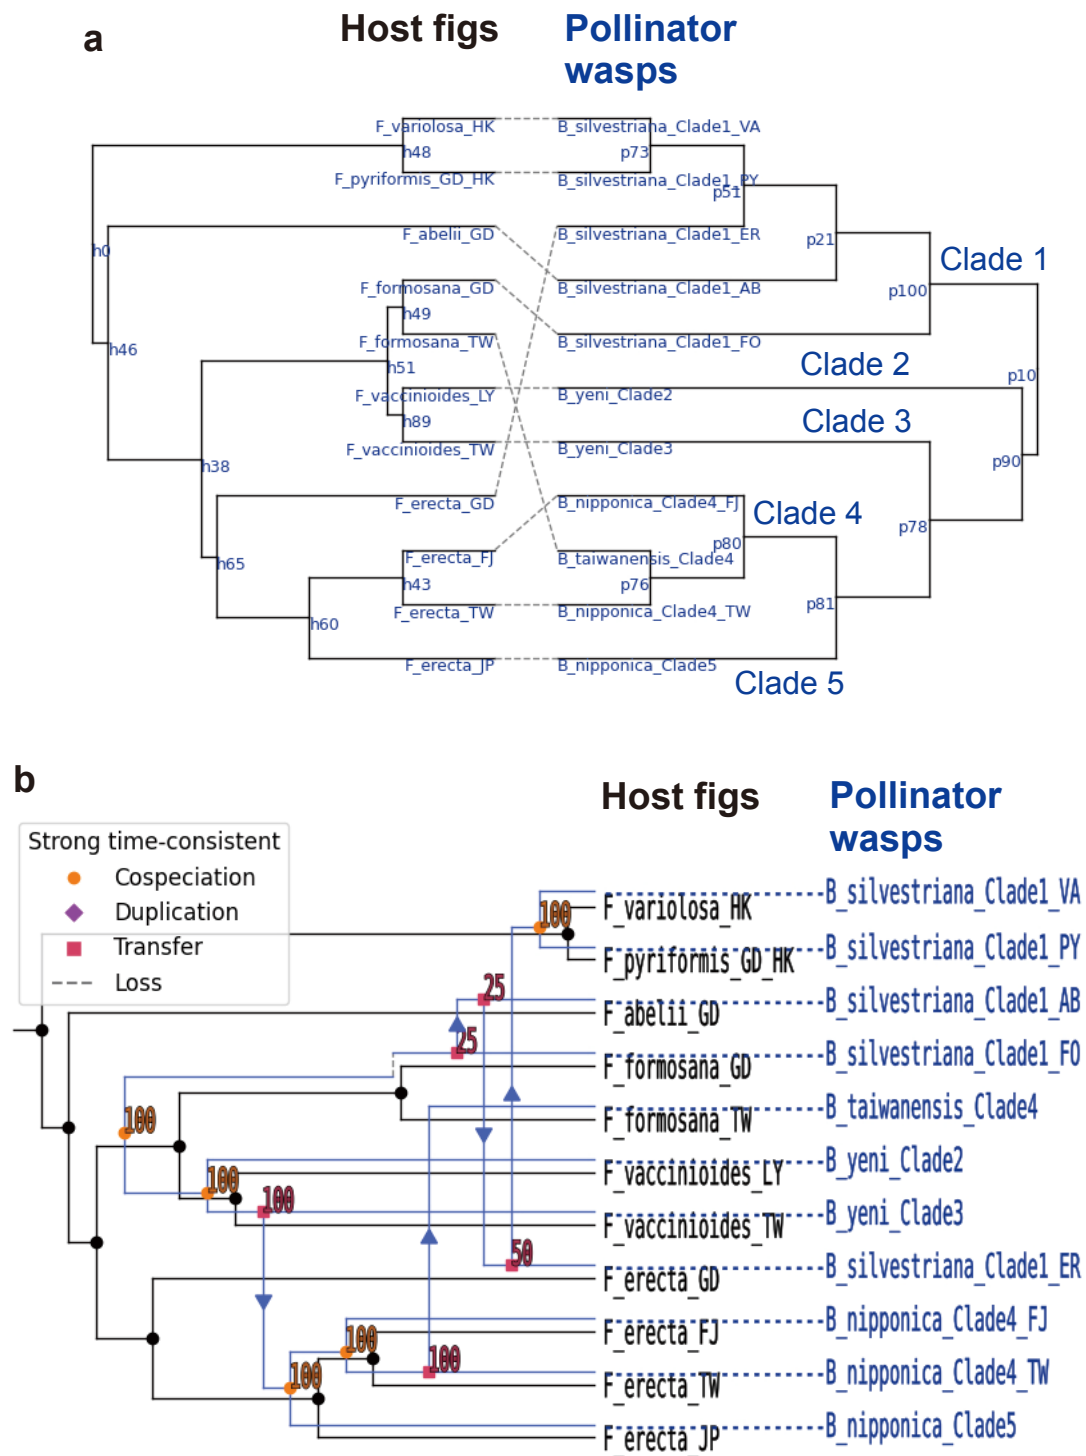

Supplementary Figure 12. Cophylogenetic analysis between figs and pollinator wasps. a, The input phylogenetic trees of figs and pollinators used for cophylogenetic analysis. The tree topologies are based on the results of phylogenetic analyses (Figs. 2 and 3) and population genetic analyses (Fig. 4a and 4d, and Supplementary Tables 1 and 2). These tree topologies are the same to those shown in Fig. 5, except for the *B. silvestriana* wasps within Clade 1. Although these wasps are genetically indistinguishable (Fig. 3), each host-pollinator association between *B. silvestriana* and its five host fig species was used in the analysis because the software does not allow multiple host species to be associated with one pollinator species. b, Results of cophylogenetic analysis by the eMPress GUI Version 1.0<sup>75</sup>. The evolutionary events (Cospeciation, Duplication, Transfer, and Loss) and supporting values are shown. The two uppercase letters after fig species names indicate the abbreviation of the population name (see Fig. 1). The two uppercase letters after the wasp species name (*B. silvestriana*) indicate the host species: VA, *F. variolosa*; PY, *F. pyriiformis*; AB, *F. abelii*; FO, *F. formosana*; ER, *F. erecta*.

Supplementary Table 1. Pairwise  $F_{ST}$  values between fig populations analyzed based on SSR data using Arlquin v3.5<sup>68</sup>.

|             | e-IS  | e-IR  | e-YN  | e-TW  | e-MT  | e-FJ  | e-GD  | f-GD  | f-HK  | f-TW | v-TW |
|-------------|-------|-------|-------|-------|-------|-------|-------|-------|-------|------|------|
| e-IS (n=38) |       | 0.036 | *     | *     | *     | *     | *     | *     | *     | *    | *    |
| e-IR (n=36) | 0.008 |       | *     | *     | *     | *     | *     | *     | *     | *    | *    |
| e-YN (n=35) | 0.025 | 0.019 |       | *     | *     | *     | *     | *     | *     | *    | *    |
| e-TW (n=40) | 0.081 | 0.077 | 0.083 |       | *     | *     | *     | *     | *     | *    | *    |
| e-MT (n=51) | 0.093 | 0.108 | 0.099 | 0.056 |       | *     | *     | *     | *     | *    | *    |
| e-FJ (n=31) | 0.081 | 0.092 | 0.102 | 0.05  | 0.025 |       | *     | *     | *     | *    | *    |
| e-GD (n=38) | 0.18  | 0.196 | 0.208 | 0.146 | 0.165 | 0.126 |       | *     | *     | *    | *    |
| f-GD (n=34) | 0.297 | 0.333 | 0.325 | 0.334 | 0.321 | 0.316 | 0.312 |       | 0.018 | *    | *    |
| f-HK (n=35) | 0.3   | 0.334 | 0.329 | 0.34  | 0.333 | 0.326 | 0.314 | 0.019 |       | *    | *    |
| f-TW (n=51) | 0.256 | 0.285 | 0.272 | 0.279 | 0.27  | 0.259 | 0.245 | 0.123 | 0.136 |      | *    |
| v-TW (n=30) | 0.267 | 0.287 | 0.28  | 0.262 | 0.269 | 0.258 | 0.243 | 0.267 | 0.276 | 0.2  |      |

p-value: \* < 0.001

e, *Ficus erecta*; f, *F. formosana*; v, *F. vaccinioides*

Population abbreviations: IS, Ishigaki Island; IR, Iriomote Island; YN, Yonaguni Island; TW, Taiwan; MT, Matsu Islands; FJ, Fujian; GD, Guangdong; HK, Hong Kong.

Supplementary Table 2. Pairwise  $F_{ST}$  values between pollinator wasp populations analyzed based on SSR data using Arlquin v3.5<sup>68</sup>.

|             | n-IS  | n-YN  | n-TW  | n-MT  | n-FJ  | t-TW  | y-TW |
|-------------|-------|-------|-------|-------|-------|-------|------|
| n-IS (n=42) |       | 0.369 | *     | *     | *     | *     | *    |
| n-YN (n=25) | 0.008 |       | *     | *     | *     | *     | *    |
| n-TW (n=36) | 0.217 | 0.22  |       | *     | *     | *     | *    |
| n-MT (n=47) | 0.31  | 0.309 | 0.113 |       | 0.198 | *     | *    |
| n-FJ (n=22) | 0.323 | 0.326 | 0.111 | 0.01  |       | *     | *    |
| t-TW (n=30) | 0.231 | 0.228 | 0.021 | 0.069 | 0.075 |       | *    |
| y-TW (n=34) | 0.29  | 0.278 | 0.273 | 0.343 | 0.347 | 0.273 |      |

p-value: \* < 0.001

n, *Blastophaga nipponica*; t, "*B. taiwanensis*"; y, *B. yeni*/*B. sp.*

For population abbreviations, refer to Fig. 1 and Supplementary Table 1.



Supplementary Table 3. Primers used for PCR amplification in this study.

| Primer name                                                                                                                                              | Sequence                      | Direction | Reference               |
|----------------------------------------------------------------------------------------------------------------------------------------------------------|-------------------------------|-----------|-------------------------|
| For 28S rDNA                                                                                                                                             |                               |           |                         |
| 28S-01                                                                                                                                                   | GACTACCCCCTGAATTTAAGCAT       | Forward   | Su et al. <sup>53</sup> |
| 28SR-01                                                                                                                                                  | GACTCCTTGGTCCGTGTTTCAAG       | Reverse   | "                       |
| This primer pair amplified the 28S rDNA region from all fig wasp samples.                                                                                |                               |           |                         |
| For ITS1 of wasps                                                                                                                                        |                               |           |                         |
| 18S_F1                                                                                                                                                   | GTCGCTACTACCGATTGAATGA        | Forward   | This study              |
| 5.8S_R1                                                                                                                                                  | GTGCGTTCGAAATGTCGATGTTCA      | Reverse   | This study              |
| This primer pair was used for <i>B. nipponica</i> , " <i>B. taiwanensis</i> ", <i>B. yeni</i> , and <i>B. silvestriana</i> (Ref. Supplementary Fig. S8). |                               |           |                         |
| For COI-COII                                                                                                                                             |                               |           |                         |
| COI1-1-ple                                                                                                                                               | TTAATTGGAAATGATCAAATTTATAAT   | Forward   | Su et al. <sup>32</sup> |
| COII-BNR                                                                                                                                                 | ATCGAATTTGACAATTTATTGG        | Reverse   | This study              |
| COI-2M                                                                                                                                                   | ACATAATGAAAATGTGCTACTACATAATA | Reverse   | Su et al. <sup>32</sup> |
| COI-2MbengF                                                                                                                                              | TATTATGTTGTTGCTCATTTTCATTATGT | Forward   | This study              |

|                                                                                                                                                                                                                                  |                            |         |                            |
|----------------------------------------------------------------------------------------------------------------------------------------------------------------------------------------------------------------------------------|----------------------------|---------|----------------------------|
| COI1-1-ple / BNR pair was used for <i>B. nipponica</i> , " <i>B. taiwanensis</i> ", and <i>B. yeni</i> . COI1-1-ple / COI-2M and COI-2MbengF / COI2-BNR pairs were used for <i>B. silvestriana</i> .                             |                            |         |                            |
| For plastid DNA                                                                                                                                                                                                                  |                            |         |                            |
| C1F                                                                                                                                                                                                                              | CCC CCT AGA AAC GTA TAG GA | Forward | Azuma et al. <sup>16</sup> |
| C1R                                                                                                                                                                                                                              | ATA GTC CAT GAT GGA GCT CG | Reverse | "                          |
| C2F                                                                                                                                                                                                                              | GGT AAA AGT GTG ATT CGT TC | Forward | "                          |
| C2R                                                                                                                                                                                                                              | GTT TCA TTC GGC TCC TTT AT | Reverse | "                          |
| C3F                                                                                                                                                                                                                              | AGA GAT GGT TCT ACT TCG TC | Forward | "                          |
| C3R                                                                                                                                                                                                                              | ACT TTC ATC TCG TAC AGC TC | Reverse | "                          |
| C5F                                                                                                                                                                                                                              | CGA AAT CGG TAG ACG CTA CG | Forward | "                          |
| C5R                                                                                                                                                                                                                              | GGG GAT AGA GGG ACT TGA AC | Reverse | "                          |
| C6F                                                                                                                                                                                                                              | GGT TCA AGT CCC TCT ATC CC | Forward | "                          |
| C6R                                                                                                                                                                                                                              | ATT TGA ACT GGT GAC ACG AG | Reverse | "                          |
| C9F                                                                                                                                                                                                                              | AGA ACC AGA AGT AGT AGG AT | Forward | "                          |
| C9R                                                                                                                                                                                                                              | ACA CCA GCT TTG AAT CCA AC | Reverse | "                          |
| C1F-C1R for <i>rps16</i> intron; C2F-C2R for <i>trnG</i> intron; C3F-C3R for <i>petB</i> intron; C5F-C5R for <i>trnL</i> intron; C6F-C6R for <i>trnL-trnF</i> intergenic spacer; C9F-C9R for <i>atpB-rbcL</i> intergenic spacer. |                            |         |                            |
| For ITS of figs                                                                                                                                                                                                                  |                            |         |                            |
| ITS-Y5                                                                                                                                                                                                                           | TAGAGGAAGGAGAAGTCGTAACAA   | Forward | Azuma et al. <sup>16</sup> |

|                                                                                                                     |                           |         |                              |
|---------------------------------------------------------------------------------------------------------------------|---------------------------|---------|------------------------------|
| ITS-Y4                                                                                                              | CCCGCCTGACCTGGGGTCGC      | Reverse | "                            |
| This primer pair was used for amplification of ITS region from fig leaves and pollens (Ref. Supplementary Fig. S3). |                           |         |                              |
| For SSR of figs                                                                                                     |                           |         |                              |
| Frac241                                                                                                             | GGCTCAAGCAAGGGATGGA       | Forward | Crozier et al. <sup>62</sup> |
|                                                                                                                     | CGAGCTCATTTGTTTATCGACC    | Reverse |                              |
| Frub061                                                                                                             | GTACACTCTCTTAGCTGCC       | Forward | "                            |
|                                                                                                                     | TACCTTTCTCTGGACATTC       | Reverse |                              |
| Frub391                                                                                                             | AGATGTCAAATAAGGTCAGCT     | Forward | "                            |
|                                                                                                                     | AGATGCAGTTCCATACAATTC     | Reverse |                              |
| Frub416                                                                                                             | CAGCAATGATCTTGACCT        | Forward | "                            |
|                                                                                                                     | GTACTCATCAATATCTCTAAACAAC | Reverse |                              |
| Frac222                                                                                                             | ACCCATATAGCAGTCTTCAGA     | Forward | "                            |
|                                                                                                                     | GCTTGTTGACTCCGCAACTA      | Reverse |                              |
| FinsM5                                                                                                              | ATGAATGGTGAAATCCTGAA      | Forward | Vignes et al. <sup>63</sup>  |
|                                                                                                                     | CATGGCCTCAACTTAGAAAC      | Reverse |                              |
| FinsQ5                                                                                                              | CATGTCAGGAGGTGTCTAGG      | Forward | "                            |
|                                                                                                                     | CCAAATGGGTATGTCAAG        | Reverse |                              |
| FM1-27                                                                                                              | GTGATTTGCGATGGCGTGGTTTA   | Forward | Zavodna et al. <sup>64</sup> |

|                                |                          |         |                           |
|--------------------------------|--------------------------|---------|---------------------------|
|                                | CGCTTGCTCGTCAGTGTCC      | Reverse |                           |
| FereACOI                       | CGATCTCGACGACACTACA      | Forward | This study                |
|                                | GTGTGGAATTTTCGATAGGC     | Reverse |                           |
| For SSR of<br>pollinator wasps |                          |         |                           |
| Ega01                          | GACATACCATCTCCTCTTCC     | Forward | Kusumi & Su <sup>74</sup> |
|                                | GCGGAAAAATCCCACAACCTC    | Reverse |                           |
| Ega03                          | TAGCTCCTGAGAGTGAGAGC     | Forward | "                         |
|                                | TTCACATCCATTACTTGAAAAG   | Reverse |                           |
| Ega06                          | ATTTATCAGCGTAGCGAGAG     | Forward | "                         |
|                                | GCGTAACGGTAAGGCTGTTC     | Reverse |                           |
| Ega07                          | CTAAGCTCCCAGTAATTTTCAC   | Forward | "                         |
|                                | AGTGCAGCAGTCAACGACAC     | Reverse |                           |
| Ega08                          | CCTCTTAGAAAGCATGACTC     | Forward | "                         |
|                                | TGATACATGGACATCGTG       | Reverse |                           |
| Ega09                          | TAATACAAAAGAGACAGTAGAAGG | Forward | "                         |
|                                | ACTCCTTATCCTTGCCGTTTC    | Reverse |                           |
| Ega10                          | CAGTGAGGTACAACGAATAGAG   | Forward | "                         |
|                                | GGCTTTTCTTGGAACGACAG     | Reverse |                           |
| Ega11                          | AAATTACTCGACGCCTACATACC  | Forward | "                         |

|       |                        |         |   |
|-------|------------------------|---------|---|
|       | TCTTGTTCTTTTCGATGTGA   | Reverse |   |
| Hga04 | GGAGTGAGTACCTTGGTTAGAG | Forward | " |
|       | GGATCGTTACCAGCACCAAT   | Reverse |   |
| Hga09 | AAGTGTGAAGGGATTAGAGTGA | Forward | " |
|       | GGTTTCATAGGCATTTTTCTT  | Reverse |   |
| Hga10 | CAGATTCAGAAAAACGGCG    | Forward | " |
|       | ATGAGCGACTGAGAGAGTGT   | Reverse |   |
| Eca15 | TTCAGCGACGGTAAGTTCTG   | Forward | " |
|       | ACTCTTCGAGGGGGTTAAAT   | Reverse |   |
| Eca22 | TGCATATGTGTATAATGAGCA  | Forward | " |
|       | ATAACGTACTCCTGGAAAATTA | Reverse |   |
| Hca07 | ATATGCACTTTTATTGGAACC  | Forward | " |
|       | GGGCCACACAATAATCCAAC   | Reverse |   |
| Hca19 | GAGGCATTTAATGAATCCTCT  | Forward | " |
|       | AAACGATACTTGCAACGAAG   | Reverse |   |

Supplementary Table 4. PCR amplification conditions.

|                                                                                                                                                                         |              |           |
|-------------------------------------------------------------------------------------------------------------------------------------------------------------------------|--------------|-----------|
| For plastide DNA ( <i>rps16</i> intron, <i>trnG</i> intron, <i>trnL</i> intron, and <i>trnL-trnF</i> intergenic spacer) of figs, 28S rDNA and ITS1 of pollinator wasps. |              |           |
| 94 °C                                                                                                                                                                   | 1 min        | 35 cycles |
| 95 °C                                                                                                                                                                   | 20 sec       |           |
| 58 °C                                                                                                                                                                   | 10 sec       |           |
| 68 °C                                                                                                                                                                   | 2 min        |           |
| 72 °C                                                                                                                                                                   | 10 min       |           |
| 4 °C                                                                                                                                                                    | Stored       |           |
| For plastide DNA ( <i>petB</i> intron and <i>atpB-rbcL</i> intergenic spacer) of figs.                                                                                  |              |           |
| 94 °C                                                                                                                                                                   | 5 min        | 35 cycles |
| 94 °C                                                                                                                                                                   | 1 min        |           |
| 50 °C                                                                                                                                                                   | 1 min 30 sec |           |
| 72 °C                                                                                                                                                                   | 2 min        |           |
| 72 °C                                                                                                                                                                   | 7 min        |           |
| 4 °C                                                                                                                                                                    | Stored       |           |
| For ITS of figs.                                                                                                                                                        |              |           |
| 94 °C                                                                                                                                                                   | 5 min        | 35 cycles |
| 94 °C                                                                                                                                                                   | 30 sec       |           |
| 50 °C                                                                                                                                                                   | 30 sec       |           |

|                                                |        |              |                                          |              |
|------------------------------------------------|--------|--------------|------------------------------------------|--------------|
| 72 °C                                          | 1 min  |              |                                          |              |
| 72 °C                                          | 7 min  |              |                                          |              |
| 4 °C                                           | Stored |              |                                          |              |
| For mtDNA (COI-COII) of pollinator wasps.      |        |              |                                          |              |
| COI1-1-ple / COI-2M and COI-2MbengF / COII-BNR |        |              | COI1-1-ple / COII-BNR                    |              |
| 94 °C                                          | 5 min  |              | 94 °C                                    | 5 min        |
| 94 °C                                          | 30 sec |              | 94 °C                                    | 30 sec       |
| 50 °C                                          | 1 min  | 50 cycles    | 48 °C                                    | 1 min        |
| 70 °C                                          | 2 min  |              | 70 °C                                    | 1 min        |
| 70 °C                                          | 7 min  |              | 70 °C                                    | 10 min       |
| 4 °C                                           | Stored |              | 4 °C                                     | Stored       |
| For SSR.                                       |        |              |                                          |              |
| Figs: fluorescent primer                       |        |              | Fig wasps: with M13 primer as an adaptor |              |
| 94 °C                                          | 15 min |              | 95 °C                                    | 5 min        |
| 94 °C                                          | 30 sec |              | 95 °C                                    | 30 sec       |
| 57 °C                                          | 90 sec | 35-40 cycles | 58 °C                                    | 1 min 30 sec |
| 72 °C                                          | 1 min  |              | 72 °C                                    | 1 min        |
| 72 °C                                          | 10 min |              | 95 °C                                    | 30 sec       |
| 4 °C                                           | Stored |              | 55 °C                                    | 1 min        |

|  |       |        |
|--|-------|--------|
|  | 72 °C | 1 min  |
|  | 72 °C | 5 min  |
|  | 4 °C  | Stored |
