# Supplementary material for: Pollinator sharing, copollination, and speciation by host shifting among six closely related dioecious fig species
Source: PubMed Central journal article supplement (PMC8993897; doi:10.1038/s42003-022-03223-0), 2022-04-08
Supplement: 42003_2022_3223_MOESM3_ESM.pdf [file 42003_2022_3223_MOESM3_ESM.pdf]

## Description of Additional Supplementary Files

**File name:** Supplementary Data 1

**Description:** Detailed sample list and data information used in this study.
